# Supplementary material for: Binding site opening by loop C shift and chloride ion-pore interaction in the GABAAreceptor model
Source: Royal Society of Chemistry journal article supplement (doi:10.1039/c7cp00582b), 2017-01-01
Supplement: c7cp00582b1.pdf [file c7cp00582b1.pdf]

|  |             |        |        |        |        |        |        |       |        |        |        |        |        |        |        |        |        |        |        |        |        |        |        |        |        |        |        |        |        |        |        |        |        |        |              |              |              |
|--|-------------|--------|--------|--------|--------|--------|--------|-------|--------|--------|--------|--------|--------|--------|--------|--------|--------|--------|--------|--------|--------|--------|--------|--------|--------|--------|--------|--------|--------|--------|--------|--------|--------|--------|--------------|--------------|--------------|
|  | GRRAL HUMAN | 100.00 | 69.98  | 56.44  | 56.83  | 58.07  | 58.82  | 37.84 | 41.08  | 43.21  | 44.59  | 32.46  | 32.07  | 33.91  | 33.99  | 29.24  | 34.45  | 32.06  | 34.37  | 42.17  | 39.20  | 33.25  | 34.97  | 33.64  | 42.86  | 34.57  | 34.12  | 41.92  | 29.10  | 31.19  | 35.03  | 25.35  | 11.75  | 12.29  | GARR2 HUMAN  |              |              |
|  | GRRAL HUMAN | 69.98  | 100.00 | 61.11  | 62.04  | 60.47  | 62.49  | 38.90 | 48.35  | 48.86  | 51.27  | 33.75  | 33.76  | 33.83  | 33.63  | 33.78  | 32.33  | 37.43  | 36.50  | 37.67  | 37.08  | 37.08  | 37.19  | 37.25  | 43.75  | 37.28  | 37.08  | 41.92  | 31.12  | 32.20  | 35.89  | 36.56  | 14.53  | 12.83  | GARR3 HUMAN  |              |              |
|  | GRRAL HUMAN | 56.44  | 61.11  | 100.00 | 69.70  | 69.30  | 69.84  | 36.39 | 43.59  | 43.68  | 45.76  | 29.76  | 31.25  | 31.00  | 31.16  | 31.23  | 35.46  | 35.21  | 36.90  | 41.57  | 38.71  | 33.62  | 34.70  | 32.85  | 40.48  | 33.99  | 34.66  | 40.42  | 29.20  | 29.00  | 25.03  | 25.65  | 14.05  | 14.95  | GARR4 HUMAN  |              |              |
|  | GRRAL HUMAN | 56.83  | 62.04  | 69.70  | 100.00 | 70.51  | 72.77  | 36.73 | 46.21  | 45.37  | 45.78  | 31.07  | 30.24  | 31.26  | 31.20  | 31.60  | 29.79  | 37.11  | 37.03  | 37.70  | 41.67  | 38.36  | 35.31  | 33.82  | 40.77  | 35.48  | 36.02  | 40.72  | 30.71  | 23.59  | 34.43  | 35.05  | 13.43  | 11.84  | GARR5 HUMAN  |              |              |
|  | GRRAL HUMAN | 58.07  | 60.77  | 69.30  | 70.51  | 100.00 | 75.63  | 35.34 | 43.10  | 45.43  | 45.34  | 31.71  | 30.77  | 30.95  | 32.99  | 32.88  | 30.23  | 37.43  | 35.93  | 38.38  | 41.67  | 38.57  | 34.97  | 35.49  | 41.95  | 35.73  | 36.02  | 41.92  | 31.07  | 30.46  | 34.43  | 34.74  | 13.87  | 12.04  | GARR6 HUMAN  |              |              |
|  | GRRAL HUMAN | 56.02  | 60.49  | 69.84  | 72.77  | 75.63  | 100.00 | 38.28 | 44.73  | 43.38  | 44.01  | 30.71  | 30.02  | 31.31  | 33.92  | 32.17  | 29.84  | 35.68  | 36.20  | 39.42  | 41.57  | 35.62  | 33.98  | 35.88  | 41.95  | 36.16  | 35.55  | 41.32  | 30.69  | 31.33  | 35.33  | 35.65  | 14.29  | 12.42  | GARR7 HUMAN  |              |              |
|  | GRRAL HUMAN | 37.84  | 38.38  | 36.73  | 38.34  | 38.78  | 110.00 | 44.86 | 43.41  | 43.34  | 28.09  | 33.75  | 32.51  | 32.17  | 30.90  | 31.66  | 30.43  | 31.66  | 30.60  | 30.67  | 36.75  | 27.63  | 30.18  | 31.71  | 37.47  | 41.37  | 37.16  | 39.11  | 39.82  | 30.87  | 32.73  | 33.03  | 13.03  | 11.99  | GARR8 HUMAN  |              |              |
|  | GRRAL HUMAN | 43.08  | 48.35  | 43.59  | 46.21  | 43.10  | 43.73  | 44.86 | 100.00 | 69.21  | 68.35  | 32.25  | 32.84  | 32.75  | 38.06  | 33.77  | 31.65  | 35.26  | 35.88  | 37.19  | 41.57  | 38.86  | 33.86  | 38.79  | 40.77  | 35.40  | 35.09  | 38.82  | 35.34  | 28.08  | 32.73  | 33.03  | 15.08  | 10.69  | GARR9 HUMAN  |              |              |
|  | GRRAL HUMAN | 43.21  | 48.96  | 41.86  | 45.76  | 45.43  | 43.38  | 43.41 | 69.21  | 100.00 | 71.21  | 33.75  | 32.51  | 32.17  | 33.90  | 31.66  | 32.50  | 38.83  | 37.75  | 38.99  | 43.98  | 31.71  | 35.37  | 36.14  | 47.47  | 41.37  | 37.16  | 39.11  | 39.82  | 30.87  | 32.73  | 33.03  | 13.03  | 11.99  | GARR10 HUMAN |              |              |
|  | GRRAL HUMAN | 44.59  | 51.27  | 43.88  | 45.76  | 45.34  | 44.01  | 43.34 | 68.30  | 71.21  | 100.00 | 33.75  | 33.89  | 33.42  | 37.53  | 34.83  | 30.02  | 38.02  | 38.48  | 36.68  | 43.07  | 31.72  | 34.30  | 37.10  | 36.21  | 41.07  | 36.83  | 35.59  | 38.82  | 30.88  | 27.83  | 32.73  | 33.03  | 12.57  | 11.75        | GARR11 HUMAN |              |
|  | GRRAL HUMAN | 31.57  | 31.75  | 29.76  | 31.07  | 31.71  | 30.71  | 28.09 | 32.25  | 33.75  | 100.00 | 158.18 | 158.18 | 158.18 | 158.18 | 158.18 | 158.18 | 158.18 | 158.18 | 158.18 | 158.18 | 158.18 | 158.18 | 158.18 | 158.18 | 158.18 | 158.18 | 158.18 | 158.18 | 158.18 | 158.18 | 158.18 | 158.18 | 158.18 | 158.18       | GARR12 HUMAN |              |
|  | GRRAL HUMAN | 32.46  | 33.76  | 31.25  | 30.74  | 30.77  | 30.02  | 30.75 | 32.84  | 32.51  | 33.98  | 158.18 | 158.18 | 158.18 | 158.18 | 158.18 | 158.18 | 158.18 | 158.18 | 158.18 | 158.18 | 158.18 | 158.18 | 158.18 | 158.18 | 158.18 | 158.18 | 158.18 | 158.18 | 158.18 | 158.18 | 158.18 | 158.18 | 158.18 | 158.18       | GARR13 HUMAN |              |
|  | GRRAL HUMAN | 32.07  | 33.83  | 31.00  | 31.26  | 30.88  | 31.31  | 30.79 | 32.75  | 32.17  | 33.42  | 55.78  | 71.68  | 100.00 | 37.24  | 37.66  | 30.36  | 41.01  | 38.44  | 41.99  | 47.43  | 34.86  | 35.58  | 35.70  | 35.13  | 41.19  | 35.53  | 35.82  | 40.66  | 32.70  | 31.73  | 35.34  | 35.67  | 12.09  | 13.18        | GARR14 HUMAN |              |
|  | GRRAL HUMAN | 33.31  | 35.03  | 33.16  | 34.20  | 33.98  | 34.29  | 33.82 | 33.06  | 35.90  | 37.53  | 55.99  | 37.03  | 37.24  | 100.00 | 40.14  | 34.54  | 40.23  | 39.85  | 39.21  | 47.29  | 33.74  | 38.48  | 38.08  | 35.68  | 42.25  | 37.75  | 38.84  | 43.24  | 31.71  | 32.04  | 35.34  | 35.67  | 12.68  | 12.54        | GARR15 HUMAN |              |
|  | GRRAL HUMAN | 33.59  | 33.78  | 33.16  | 33.60  | 32.98  | 32.17  | 28.83 | 33.77  | 34.56  | 34.83  | 38.01  | 35.93  | 37.66  | 40.14  | 100.00 | 35.13  | 40.81  | 38.86  | 40.28  | 48.24  | 32.04  | 38.44  | 38.48  | 36.62  | 47.50  | 41.79  | 36.46  | 36.58  | 40.84  | 25.68  | 31.17  | 34.04  | 34.35  | 12.68        | 9.82         | GARR16 HUMAN |
|  | GRRAL HUMAN | 31.45  | 37.33  | 35.46  | 37.11  | 37.43  | 36.69  | 31.66 | 35.26  | 38.83  | 38.02  | 40.61  | 41.22  | 41.01  | 40.23  | 40.81  | 40.64  | 40.64  | 38.88  | 41.79  | 51.51  | 30.75  | 34.00  | 34.73  | 34.17  | 43.15  | 36.89  | 37.47  | 43.84  | 41.57  | 43.84  | 31.57  | 38.74  | 39.09  | 13.29        | 11.89        | GARR17 HUMAN |
|  | GRRAL HUMAN | 32.06  | 36.50  | 35.21  | 37.03  | 35.93  | 35.29  | 30.60 | 35.98  | 37.75  | 36.48  | 39.32  | 40.24  | 38.44  | 39.85  | 38.86  | 38.88  | 78.32  | 100.00 | 79.45  | 89.45  | 33.41  | 34.97  | 37.68  | 36.12  | 43.45  | 35.32  | 37.38  | 44.44  | 33.00  | 34.65  | 39.64  | 40.00  | 13.30  | 11.82        | GARR18 HUMAN |              |
|  | GRRAL HUMAN | 34.37  | 37.57  | 35.90  | 37.70  | 38.38  | 38.42  | 30.67 | 37.19  | 38.99  | 36.68  | 41.31  | 42.42  | 41.99  | 39.21  | 40.28  | 41.79  | 78.33  | 79.45  | 100.00 | 97.89  | 33.57  | 37.23  | 38.42  | 37.96  | 44.35  | 37.05  | 37.07  | 44.74  | 32.75  | 33.17  | 38.14  | 38.40  | 14.29  | 11.66        | GARR19 HUMAN |              |
|  | GRRAL HUMAN | 42.17  | 41.87  | 41.57  | 41.87  | 41.87  | 41.87  | 35.75 | 41.57  | 43.88  | 43.67  | 46.53  | 47.73  | 47.43  | 47.29  | 49.24  | 51.51  | 88.55  | 89.46  | 87.89  | 100.00 | 40.73  | 43.85  | 46.36  | 45.76  | 45.90  | 45.15  | 46.76  | 46.04  | 36.07  | 38.91  | 38.72  | 38.08  | 17.52  | 12.02        | GARR20 HUMAN |              |
|  | GRRAL HUMAN | 29.33  | 35.42  | 28.71  | 28.36  | 28.57  | 31.58  | 27.63 | 30.05  | 31.71  | 31.72  | 32.78  | 32.46  | 34.86  | 33.74  | 32.24  | 30.75  | 33.18  | 33.41  | 33.57  | 40.73  | 100.00 | 43.60  | 45.99  | 45.35  | 56.85  | 44.83  | 46.63  | 54.05  | 35.56  | 35.42  | 38.53  | 36.86  | 10.68  | 12.82        | GARR21 HUMAN |              |
|  | GRRAL HUMAN | 33.25  | 36.21  | 32.62  | 34.06  | 34.97  | 35.62  | 30.18 | 33.86  | 35.37  | 34.30  | 33.24  | 33.33  | 35.58  | 38.48  | 36.44  | 34.00  | 37.07  | 35.97  | 37.23  | 43.85  | 43.80  | 100.00 | 78.10  | 76.23  | 89.97  | 74.39  | 74.69  | 87.25  | 35.55  | 35.04  | 43.61  | 41.37  | 11.68  | 11.64        | GARR22 HUMAN |              |
|  | GRRAL HUMAN | 34.07  | 37.09  | 34.79  | 35.31  | 36.48  | 35.98  | 31.22 | 38.79  | 36.14  | 37.10  | 33.25  | 34.76  | 35.70  | 38.08  | 36.62  | 34.71  | 37.53  | 37.68  | 38.42  | 46.36  | 46.99  | 78.10  | 100.00 | 79.06  | 92.93  | 76.81  | 77.22  | 86.81  | 35.71  | 25.95  | 44.01  | 44.71  | 13.24  | 12.71        | GARR23 HUMAN |              |
|  | GRRAL HUMAN | 33.64  | 37.25  | 32.65  | 33.82  | 36.30  | 38.88  | 31.22 | 35.98  | 37.47  | 36.21  | 34.16  | 38.11  | 38.13  | 36.68  | 37.50  | 34.17  | 36.69  | 36.12  | 37.56  | 45.76  | 45.35  | 78.23  | 79.06  | 100.00 | 99.12  | 81.82  | 82.42  | 96.50  | 35.78  | 36.45  | 44.01  | 44.71  | 12.88  | 12.41        | GARR24 HUMAN |              |
|  | GRRAL HUMAN | 42.86  | 43.75  | 40.46  | 40.77  | 41.98  | 41.86  | 38.81 | 40.77  | 41.37  | 41.07  | 38.21  | 40.30  | 41.39  | 42.76  | 41.79  | 41.19  | 43.15  | 43.45  | 44.35  | 44.35  | 45.90  | 58.86  | 89.97  | 92.33  | 100.00 | 91.45  | 90.94  | 96.77  | 43.77  | 43.75  | 44.91  | 45.82  | 13.79  | 14.89        | GARR25 HUMAN |              |
|  | GRRAL HUMAN | 34.57  | 37.28  | 33.99  | 35.48  | 35.73  | 35.16  | 31.82 | 35.40  | 37.16  | 36.63  | 33.76  | 35.95  | 35.53  | 37.76  | 36.46  | 34.10  | 36.89  | 36.32  | 37.05  | 45.15  | 44.83  | 74.39  | 76.91  | 81.82  | 91.45  | 100.00 | 96.49  | 91.69  | 35.87  | 35.48  | 43.41  | 43.81  | 12.04  | 12.41        | GARR26 HUMAN |              |
|  | GRRAL HUMAN | 34.12  | 37.08  | 34.66  | 36.02  | 36.03  | 35.95  | 32.09 | 35.09  | 36.11  | 35.59  | 34.08  | 35.05  | 25.82  | 28.84  | 36.58  | 34.20  | 37.47  | 37.38  | 37.07  | 45.76  | 45.63  | 74.69  | 77.22  | 82.42  | 90.98  | 86.49  | 100.00 | 98.52  | 35.54  | 35.95  | 43.71  | 44.41  | 11.81  | 13.64        | GARR27 HUMAN |              |
|  | GRRAL HUMAN | 41.52  | 41.92  | 40.42  | 40.72  | 41.92  | 41.32  | 37.43 | 38.82  | 39.82  | 39.82  | 38.86  | 38.86  | 38.86  | 40.66  | 43.24  | 40.84  | 43.84  | 44.44  | 44.74  | 46.04  | 54.05  | 87.25  | 89.61  | 90.90  | 90.77  | 91.69  | 98.52  | 100.00 | 41.54  | 44.01  | 44.11  | 44.82  | 14.73  | 16.24        | GARR28 HUMAN |              |
|  | GRRAL HUMAN | 29.10  | 31.12  | 29.20  | 30.71  | 31.07  | 30.69  | 29.01 | 30.34  | 30.87  | 30.08  | 29.30  | 31.12  | 32.70  | 31.71  | 29.68  | 30.30  | 31.57  | 33.00  | 32.75  | 38.07  | 35.06  | 35.05  | 35.71  | 35.78  | 42.77  | 35.87  | 35.64  | 41.54  | 100.00 | 44.07  | 50.88  | 50.74  | 10.27  | 10.66        | GARR29 HUMAN |              |
|  | GRRAL HUMAN | 31.19  | 32.20  | 29.02  | 29.59  | 30.46  | 31.19  | 27.24 | 28.08  | 27.30  | 27.83  | 30.20  | 31.76  | 31.73  | 32.04  | 31.17  | 28.20  | 33.75  | 34.65  | 33.17  | 38.91  | 30.42  | 35.04  | 35.95  | 35.71  | 42.77  | 35.87  | 35.64  | 41.54  | 100.00 | 98.82  | 98.52  | 11.96  | 11.11  | GARR30 HUMAN |              |              |
|  | GRRAL HUMAN | 35.03  | 35.98  | 35.03  | 34.43  | 34.43  | 35.33  | 33.33 | 32.73  | 32.73  | 32.73  | 32.73  | 32.73  | 32.73  | 32.73  | 32.73  | 32.73  | 32.73  | 32.73  | 32.73  | 32.73  | 32.73  | 32.73  | 32.73  | 32.73  | 32.73  | 32.73  | 32.73  | 32.73  | 32.73  | 32.73  | 32.73  | 32.73  | 32.73  | 32.73        | GARR31 HUMAN |              |
|  | GRRAL HUMAN | 35.35  | 36.56  | 35.05  | 35.05  | 34.74  | 35.85  | 33.33 | 33.03  | 33.03  | 33.03  | 33.03  | 33.03  | 33.03  | 33.03  | 33.03  | 33.03  | 33.03  | 33.03  | 33.03  | 33.03  | 33.03  | 33.03  | 33.03  | 33.03  | 33.03  | 33.03  | 33.03  | 33.03  | 33.03  | 33.03  | 33.03  | 33.03  | 33.03  | 33.03        | GARR32 HUMAN |              |
|  | GRRAL HUMAN | 11.75  | 14.53  | 14.05  | 13.43  | 13.87  | 14.29  | 11.49 | 15.08  | 13.58  | 12.57  | 12.94  | 12.89  | 12.90  | 12.68  | 12.68  | 13.29  | 13.29  | 13.30  | 14.29  | 17.42  | 10.68  | 11.68  | 13.24  | 12.38  | 13.79  | 12.04  | 11.61  | 14.73  | 10.27  | 11.06  | 14.20  | 14.40  | 100.00 | 32.34        | GARR33 HUMAN |              |
|  | GRRAL HUMAN | 12.39  | 12.83  | 14.55  | 11.84  | 12.04  | 12.42  | 11.40 | 10.69  | 11.99  | 11.75  | 13.21  | 13.41  | 13.38  | 12.54  | 9.82   | 11.89  | 11.31  | 11.82  | 11.66  | 12.02  | 12.82  | 11.64  | 12.71  | 12.41  | 14.89  | 12.41  | 13.64  | 16.24  | 10.66  | 11.11  | 12.02  | 12.17  | 32.34  | 100.00       | GARR34 HUMAN |              |

Supplementary Figure 1. Sequence identity of cys-loop receptor family subunits [in %].

A

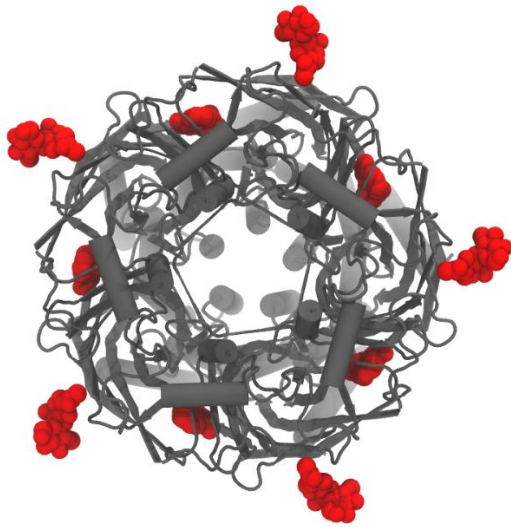

B

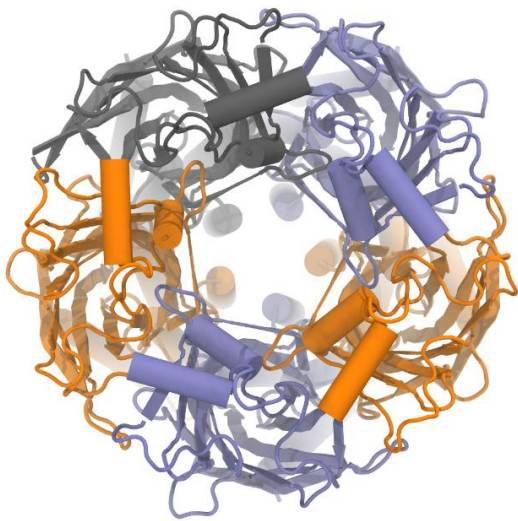

Supplementary Figure 2. A: Top view of GlyR (grey) with bound strychnine (red) structure used as a template. All subunits have same sequence. B: Same view of  $\alpha_1\beta_2\gamma_2$  GABA<sub>A</sub>R homology model.  $\alpha_1$  subunits in orange,  $\beta_2$  in blue and  $\gamma_2$  in grey.

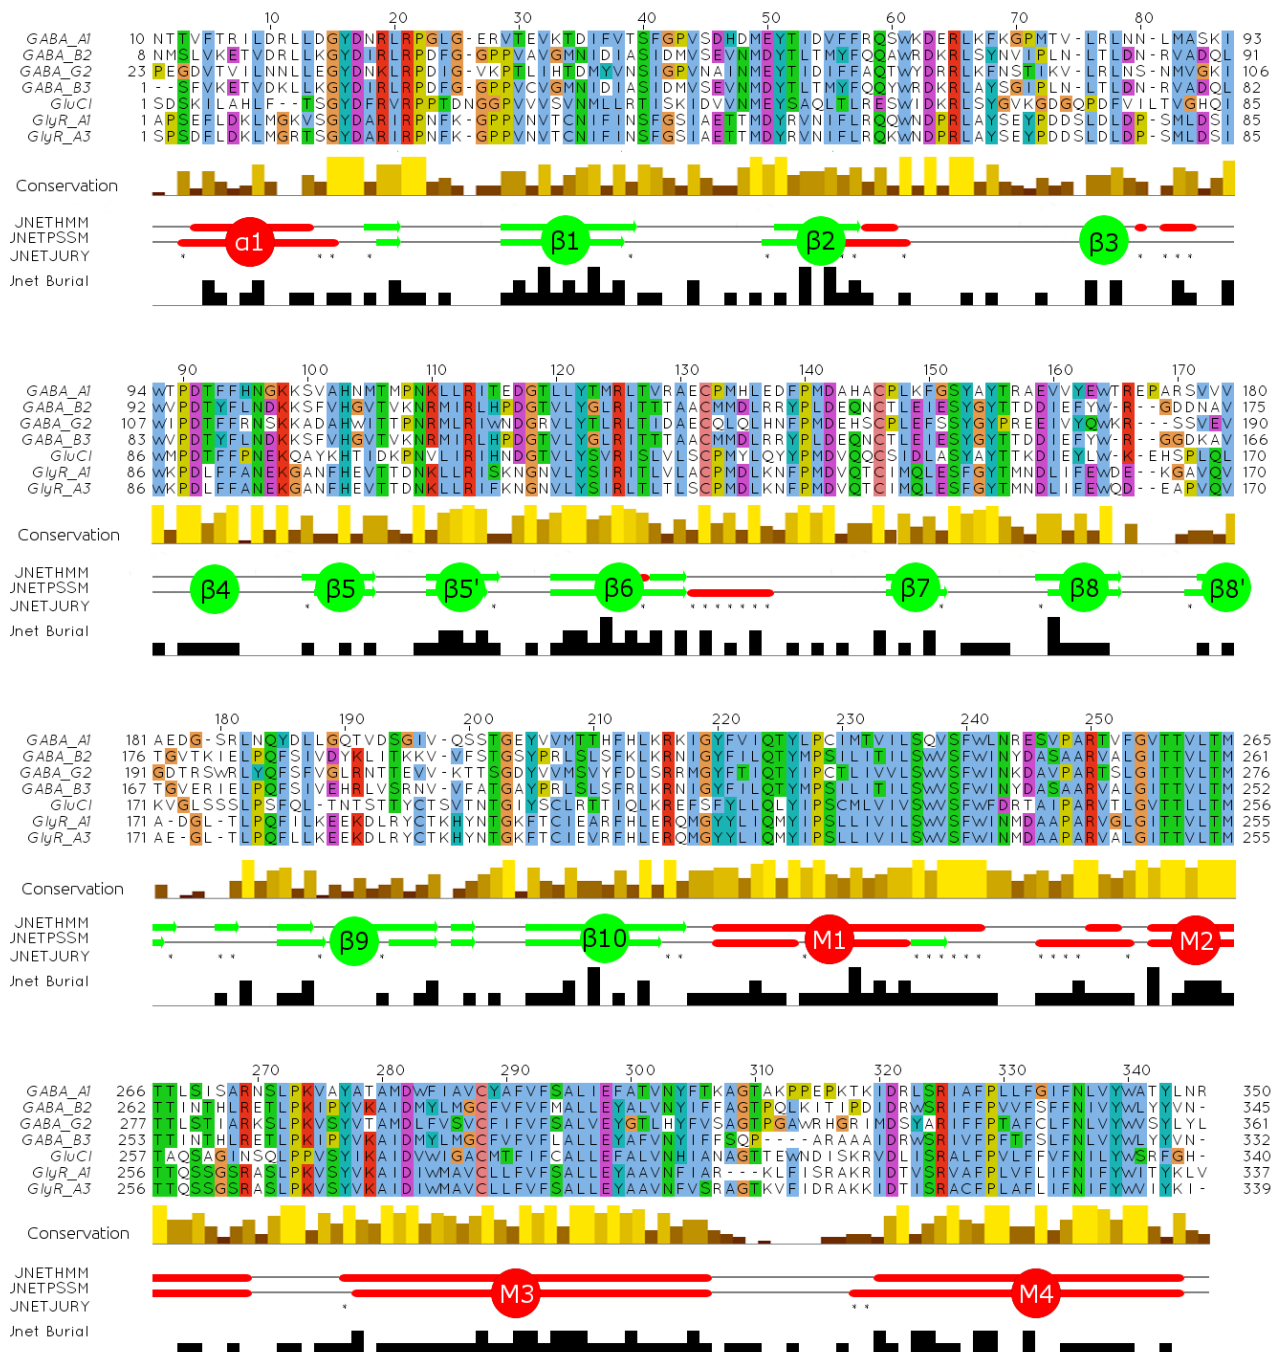

Supplementary Figure 3. Sequence alignment of subunits comprised in the presented model and selected close homologs with recently obtained crystal structures. Residues colour code: hydrophobic - blue, polar uncharged - green, positive charge - red, negative charge - violet, glycine - orange, proline - yellow, cysteine - pink, others - no colour. Secondary structure prediction presented with red lines ( $\alpha$ -helices) and green lines ( $\beta$ -strands).

A

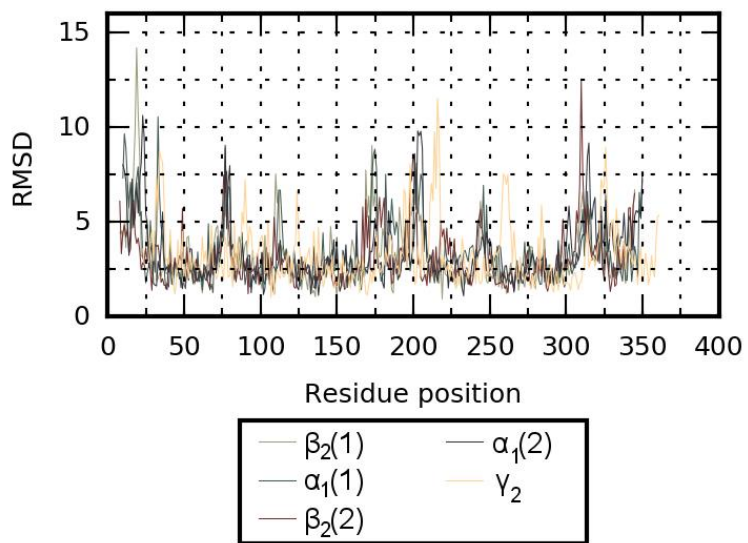

B

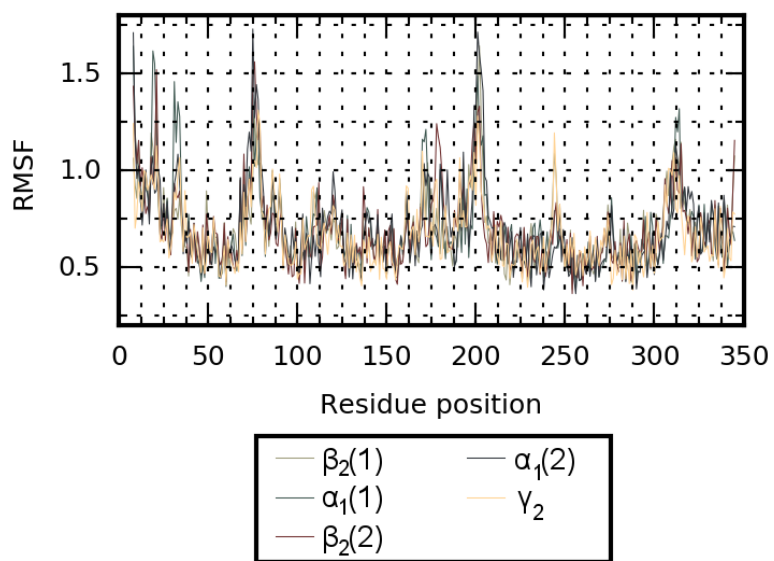

Supplementary Figure 4. Mean values of RMSD and RMSF [Å] of respective subunits' residues over.
